# Supplementary material for: MicroRNA expression analysis in high fat diet-induced NAFLD-NASH-HCC progression: study on C57BL/6J mice
Source: PubMed Central journal article supplement (PMC4700747; doi:10.1186/s12885-015-2007-1), 2016-01-05

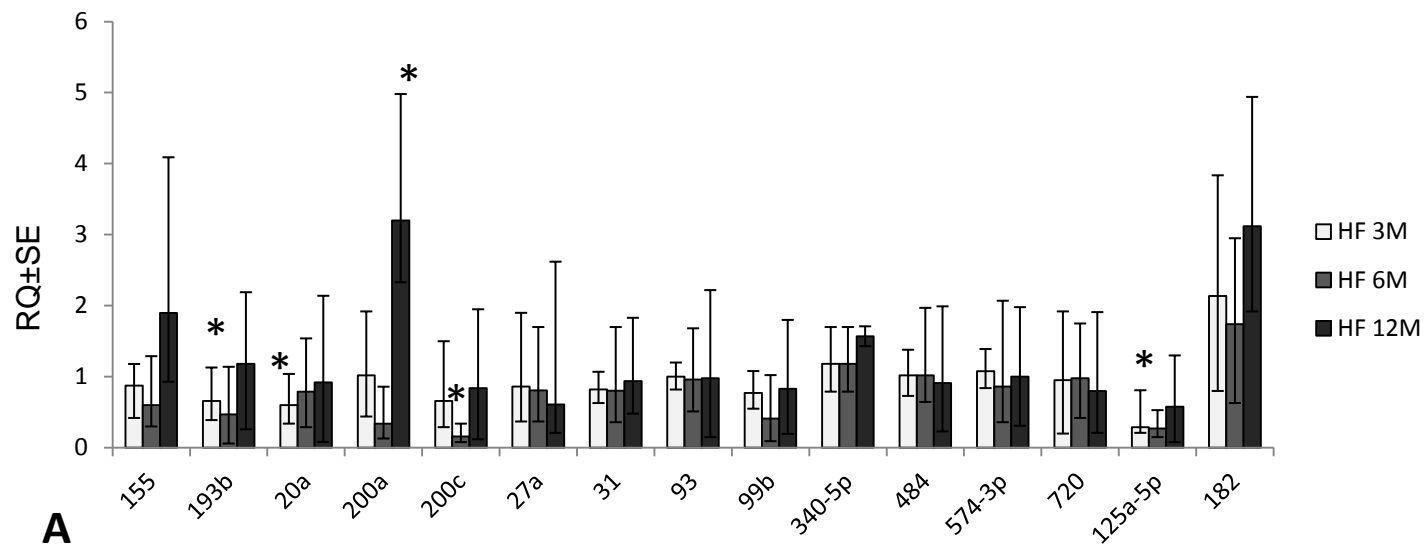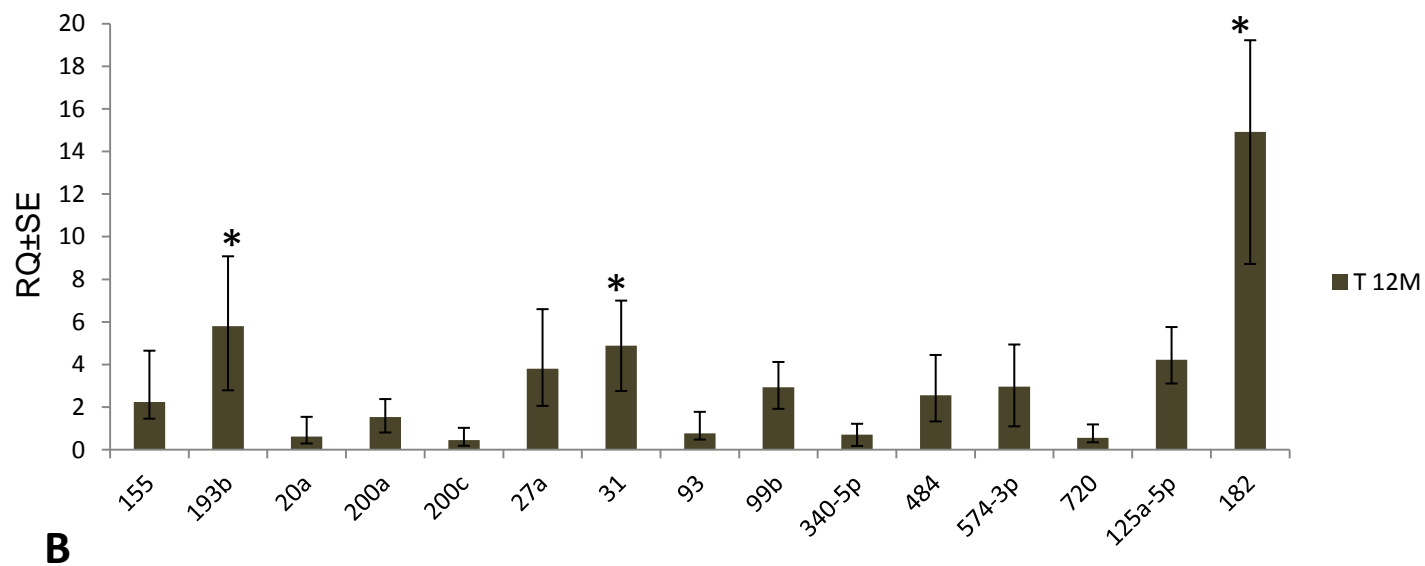

Supplement: 12885_2015_2007_MOESM2_ESM.pdf [file 12885_2015_2007_MOESM2_ESM.pdf]
